# Supplementary material for: Sleep disorders predict the one-year onset, persistence, but not remission of psychotic experiences in pre-adolescence: a longitudinal analysis of the ABCD cohort data
Source: bioRxiv or medRxiv preprint supplement (doi:10.1101/2021.01.15.21249864), 2021-09-07
Supplement: Supplementary file [file media-1.pdf]

## List of supplementary tables

|                                                                                                                                                                   |   |
|-------------------------------------------------------------------------------------------------------------------------------------------------------------------|---|
| Supplementary Table 1: Sample demographics and descriptive variables (weighted)                                                                                   | 2 |
| Supplementary Table 2a: Regression analyses of co-occurrence of sleep disorders and psychotic experiences at baseline (T0) – weighting method A                   | 3 |
| Supplementary Table 2b: Regression analyses of co-occurrence of sleep disorders and psychotic experiences at baseline (T0) – weighting method B                   | 4 |
| Supplementary Table 3a: Regression analyses of whether sleep disorders at baseline predict onset of psychotic experiences at 12 months – weighting method A       | 5 |
| Supplementary Table 3b: Regression analyses of whether sleep disorders at baseline predict onset of psychotic experiences at 12 months – weighting method B       | 6 |
| Supplementary Table 4a: Regression analyses of whether sleep disorders at baseline predict persistence of psychotic experiences at 12 months – weighting method A | 7 |
| Supplementary Table 4b: Regression analyses of whether sleep disorders at baseline predict persistence of psychotic experiences at 12 months – weighting method B | 8 |
| RQ4a: Regression analysis of whether remission of sleep problems predicts remission of psychotic experiences (weighted method A):                                 | 9 |
| RQ4a: Regression analysis of whether remission of sleep problems predicts remission of psychotic experiences (weighted method B):                                 | 9 |

Supplementary Table 1: Sample demographics and descriptive variables (weighted)

|                                                                                        | Baseline<br>n = 11830     | 12-month follow-up<br>n = 4910  |       |       |
|----------------------------------------------------------------------------------------|---------------------------|---------------------------------|-------|-------|
| <b>Descriptive statistics</b>                                                          |                           |                                 |       |       |
| Age (months) – mean (SE)                                                               | 119.2 (0.3)               | 132.2 (0.5)                     |       |       |
| Gender – male % (SE)                                                                   | 51.13 (0.1)               | 51.04 (0.9)                     |       |       |
| Ethnicity % (SE)                                                                       |                           |                                 |       |       |
| White                                                                                  | 52.34 (5.6)               | 59.48 (6.3)                     |       |       |
| Black                                                                                  | 13.31 (2.5)               | 7.61 (1.6)                      |       |       |
| Hispanic                                                                               | 23.83 (6.2)               | 22.50 (6.7)                     |       |       |
| Asian                                                                                  | 3.61 (0.9)                | 4.02 (0.9)                      |       |       |
| Other                                                                                  | 6.89 (1.0)                | 6.40 (1.3)                      |       |       |
| Socioeconomic status scale – mean (SE)                                                 | 0.56 (0.1)                | 0.47 (0.1)                      |       |       |
| Child IQ – mean (SE)                                                                   | 9.74 (0.1)                | 10.03 (0.1)                     |       |       |
| Neighbourhood deprivation percentile – mean (SE)                                       | 43.49 (3.8)               | 40.5 (3.9)                      |       |       |
| Family conflict scale – mean (SE)                                                      | 2.52 (0.1)                | 2.45 (0.06)                     |       |       |
| Stimulant medication prescribed – % (SE)                                               | 6.41 (<0.0)               | 7.00 (<0.0)                     |       |       |
| PQ-BC total – mean (SE)                                                                | 2.74 (0.3)                | 1.82 (0.2)                      |       |       |
| SDSC total – mean (SE)                                                                 | 36.78 (0.3)               | 36.59 (0.3)                     |       |       |
| <b>Derived variable counts</b>                                                         |                           |                                 |       |       |
| Sleep disorders present ( $\geq 39$ cut off on SDSC) – % (SE)                          | 31.71 (1.5)               | 29.15 (1.6)                     |       |       |
| Sleep disorders new onset ( <i>absent at baseline, present at follow up</i> ) – % (SE) |                           | 9.56 (0.1)                      |       |       |
| Sleep disorders persisting ( <i>present at both baseline and follow up</i> ) – % (SE)  |                           | 19.50 (1.6)                     |       |       |
| Sleep disorders remitting ( <i>present at baseline, absent at follow up</i> ) – % (SE) |                           | 10.48 (0.8)                     |       |       |
| Psychotic experiences present ( $\geq 1$ on PQ-BC total) – % (SE)                      | 63.08 (2.6)               | 48.25 (2.8)                     |       |       |
| Psychotic experiences new onset – % (SE)                                               |                           | 9.24 (0.9)                      |       |       |
| Psychotic experiences persisting – % (SE)                                              |                           | 29.01 (3.0)                     |       |       |
| Psychotic experiences remitting – % (SE)                                               |                           | 24.51 (1.1)                     |       |       |
| <b>Cross tabulation (sleep disorders vs psychotic experiences, % prevalence)</b>       |                           |                                 |       |       |
|                                                                                        |                           | Psychotic experience onset      |       |       |
| <b>Onset (absent at baseline, present at follow up)</b>                                |                           |                                 | No    | Yes   |
|                                                                                        | Sleep disorder onset      | No                              | 82.10 | 8.34  |
|                                                                                        |                           | Yes                             | 8.66  | 0.90  |
|                                                                                        |                           | Psychotic experience persisting |       |       |
| <b>Persistence (present at baseline and follow up)</b>                                 |                           |                                 | No    | Yes   |
|                                                                                        | Sleep disorder persisting | No                              | 51.17 | 29.33 |
|                                                                                        |                           | Yes                             | 9.84  | 9.66  |
|                                                                                        |                           | Psychotic experience remitting  |       |       |
| <b>Remission (present at baseline, absent at follow up)</b>                            |                           |                                 | No    | Yes   |
|                                                                                        | Sleep disorder remission  | No                              | 67.70 | 21.81 |
|                                                                                        |                           | Yes                             | 7.77  | 2.71  |

SDSC = Sleep Disorder Scale for Children; PQBC = Prodromal Questionnaire – Brief Child version; SE = standard error;

Supplementary Table 2a: Regression analyses of co-occurrence of sleep disorders and psychotic experiences at baseline (T0) – weighting method A

| Model (outcome)                         | Parameters                | B      | 95% CI       | p-value | AIC   |
|-----------------------------------------|---------------------------|--------|--------------|---------|-------|
| Model 1a (PQBC total T0) <sup>a</sup>   | SDSC total T0             | 0.051  | 0.04, 0.06   | <0.001  | 26047 |
| Model (outcome)                         | Parameters                | Odds   | 95% CI       | p-value | AIC   |
| Model 1b (PQBC cut-off T0) <sup>b</sup> | SDSC total T0             | 1.034  | 1.02, 1.04   | <0.001  | 6053  |
| Model 1c (PQBC cut-off T0) <sup>b</sup> | SDSC cut off T0           | 1.614  | 1.37, 1.9    | <0.001  | 6067  |
| Model (outcome)                         | Parameters                | B      | 95% CI       | p-value | AIC   |
| Model 1d (PQBC total T0) <sup>a</sup>   | SDSC total T0             | 0.040  | 0.03, 0.05   | <0.001  | 24325 |
|                                         | Gender                    | -0.248 | -0.45, -0.05 | 0.014   |       |
|                                         | Ethnicity                 | 0.055  | -0.03, 0.14  | 0.220   |       |
|                                         | Socioeconomic status      | 0.171  | 0.07, 0.28   | 0.001   |       |
|                                         | Neighbourhood deprivation | 0.011  | 0.01, 0.02   | <0.001  |       |
|                                         | IQ                        | -0.053 | -0.09, -0.02 | 0.003   |       |
|                                         | Family conflict           | 0.011  | -0.04, 0.07  | 0.688   |       |
|                                         | Stimulant medication      | 0.581  | 0.18, 0.98   | 0.004   |       |
| Model (outcome)                         | Parameters                | Odds   | 95% CI       | p-value | AIC   |
| Model 1e (PQBC cut-off T0) <sup>b</sup> | SDSC total T0             | 1.026  | 1.02, 1.04   | <0.001  | 5641  |
|                                         | Gender                    | 0.835  | 0.72, 0.97   | 0.021   |       |
|                                         | Ethnicity                 | 1.032  | 0.96, 1.11   | 0.402   |       |
|                                         | Socioeconomic status      | 1.155  | 1.06, 1.26   | 0.001   |       |
|                                         | Neighbourhood deprivation | 1.010  | 1.01, 1.01   | <0.001  |       |
|                                         | IQ                        | 0.942  | 0.92, 0.97   | <0.001  |       |
|                                         | Family conflict           | 1.004  | 0.96, 1.05   | 0.852   |       |
|                                         | Stimulant medication      | 1.208  | 0.88, 1.66   | 0.249   |       |
| Model 1f (PQBC cut off T0) <sup>b</sup> | SDSC cut off T0           | 1.470  | 1.23, 1.75   | <0.001  | 5647  |
|                                         | Gender                    | 0.834  | 0.72, 0.97   | 0.020   |       |
|                                         | Ethnicity                 | 1.034  | 0.96, 1.11   | 0.378   |       |
|                                         | Socioeconomic status      | 1.167  | 1.07, 1.27   | <0.001  |       |
|                                         | Neighbourhood deprivation | 1.010  | 1.01, 1.01   | <0.001  |       |
|                                         | IQ                        | 0.942  | 0.92, 0.97   | <0.001  |       |
|                                         | Family conflict           | 1.010  | 0.97, 1.05   | 0.638   |       |
|                                         | Stimulant medication      | 1.237  | 0.90, 1.70   | 0.192   |       |

<sup>a</sup> = linear regression; <sup>b</sup> = logistic regression; SDSC = Sleep Disorder Scale for Children; PQBC = Prodromal Questionnaire – Brief Child version; B = standardised beta; CI = confidence intervals; AIC = Akaike information criterion.

Supplementary Table 2b: Regression analyses of co-occurrence of sleep disorders and psychotic experiences at baseline (T0) – weighting method B

| Model (outcome)                         | Parameters                | B      | 95% CI       | p-value | AIC   |
|-----------------------------------------|---------------------------|--------|--------------|---------|-------|
| Model 1a (PQBC total T0) <sup>a</sup>   | SDSC total                | 0.051  | 0.04, 0.06   | <0.001  | 26054 |
| Model (outcome)                         | Parameters                | Odds   | 95% CI       | p-value | AIC   |
| Model 1b (PQBC cut-off T0) <sup>b</sup> | SDSC total                | 1.029  | 1.02, 1.04   | <0.001  | 5027  |
| Model 1c (PQBC cut-off T0) <sup>b</sup> | SDSC cut off              | 1.501  | 1.29, 1.75   | <0.001  | 5039  |
| Model (outcome)                         | Parameters                | B      | 95% CI       | p-value | AIC   |
| Model 1d (PQBC total T0) <sup>a</sup>   | SDSC total                | 0.040  | 0.03, 0.05   | <0.001  | 24333 |
|                                         | Gender                    | -0.247 | -0.45, -0.05 | 0.015   |       |
|                                         | Ethnicity                 | 0.057  | -0.03, 0.15  | 0.207   |       |
|                                         | Socioeconomic status      | 0.170  | 0.07, 0.27   | 0.001   |       |
|                                         | Neighbourhood deprivation | 0.011  | 0.01, 0.02   | <0.001  |       |
|                                         | IQ                        | -0.053 | -0.09, -0.02 | 0.003   |       |
|                                         | Family                    | 0.011  | -0.04, 0.07  | 0.694   |       |
|                                         | Stimulant medication      | 0.582  | 0.18, 0.98   | 0.004   |       |
| Model (outcome)                         | Parameters                | Odds   | 95% CI       | p-value | AIC   |
| Model 1e (PQBC cut-off T0) <sup>b</sup> | SDSC total                | 1.022  | 1.01, 1.03   | <0.001  | 4687  |
|                                         | Gender                    | 0.876  | 0.76, 1.01   | 0.066   |       |
|                                         | Ethnicity                 | 1.037  | 0.97, 1.11   | 0.296   |       |
|                                         | Socioeconomic status      | 1.147  | 1.06, 1.24   | 0.001   |       |
|                                         | Neighbourhood deprivation | 1.008  | 1.00, 1.01   | <0.001  |       |
|                                         | IQ                        | 0.952  | 0.93, 0.98   | <0.001  |       |
|                                         | Family                    | 1.002  | 0.96, 1.04   | 0.910   |       |
|                                         | Stimulant medication      | 1.151  | 0.86, 1.55   | 0.353   |       |
| Model 1f (PQBC cut off T0) <sup>b</sup> | SDSC cut off              | 1.374  | 1.17, 1.62   | <0.001  | 4693  |
|                                         | Gender                    | 0.875  | 0.76, 1.01   | 0.063   |       |
|                                         | Ethnicity                 | 1.038  | 0.97, 1.11   | 0.280   |       |
|                                         | Socioeconomic status      | 1.157  | 1.07, 1.25   | <0.001  |       |
|                                         | Neighbourhood deprivation | 1.008  | 1.00, 1.01   | <0.001  |       |
|                                         | IQ                        | 0.952  | 0.93, 0.98   | <0.001  |       |
|                                         | Family                    | 1.008  | 0.97, 1.05   | 0.693   |       |
|                                         | Stimulant medication      | 1.180  | 0.88, 1.59   | 0.274   |       |

<sup>a</sup> = linear regression; <sup>b</sup> = logistic regression; SDSC = Sleep Disorder Scale for Children; PQBC = Prodromal Questionnaire – Brief Child version; B = standardised beta; CI = confidence intervals; AIC = Akaike information criterion.

Supplementary Table 3a: Regression analyses of whether sleep disorders at baseline predict onset of psychotic experiences at 12 months – weighting method A

| Model (outcome)            | Parameters                | Odds       | 95% CI     | p-value | AIC  |
|----------------------------|---------------------------|------------|------------|---------|------|
| Model 2a (PQBC cut off T1) | SDSC cut off T0           | 1.719      | 1.47, 2.01 | <0.001  | 6303 |
| Model 2b (PQBC cut off T1) | SDSC cut off T0           | 1.482      | 1.24, 1.77 | <0.001  | 6294 |
|                            | SDSC cut off T1           | 1.346      | 1.12, 1.61 | 0.001   |      |
| Model 2c (PQBC cut off T1) | SDSC cut off T0           | 1.511      | 1.29, 1.77 | <0.001  | 5826 |
|                            | Gender                    | 0.808      | 0.7, 0.93  | 0.003   |      |
|                            | Ethnicity                 | 1.066      | 1.00, 1.13 | 0.041   |      |
|                            | Socioeconomic status      | 1.231      | 1.14, 1.33 | <0.001  |      |
|                            | Neighbourhood deprivation | 1.009      | 1.01, 1.01 | <0.001  |      |
|                            | IQ                        | 0.969      | 0.95, 0.99 | 0.013   |      |
|                            | Family conflict           | 0.994      | 0.96, 1.03 | 0.749   |      |
|                            | Stimulant medication      | 1.702      | 1.28, 2.26 | <0.001  |      |
| Model 2d (PQBC cut off T1) | SDSC cut off T0           | 1.318      | 1.32, 1.32 | <0.001  | 5819 |
|                            | SDSC cut off T1           | 1.328      | 1.33, 1.33 | <0.001  |      |
|                            | Gender                    | 0.798      | 0.80, 0.80 | <0.001  |      |
|                            | Ethnicity                 | 1.064      | 1.06, 1.07 | <0.001  |      |
|                            | Socioeconomic status      | 1.220      | 1.22, 1.22 | <0.001  |      |
|                            | Neighbourhood deprivation | 1.009      | 1.01, 1.01 | <0.001  |      |
|                            | IQ                        | 0.969      | 0.97, 0.97 | <0.001  |      |
|                            | Family conflict           | 0.992      | 0.99, 0.99 | <0.001  |      |
| Stimulant medication       | 1.677                     | 1.67, 1.68 | <0.001     |         |      |

SDSC = Sleep Disorder Scale for Children; PQBC = Prodromal Questionnaire – Brief Child version; CI = confidence intervals; AIC = Akaike information criterion

Supplementary Table 3b: Regression analyses of whether sleep disorders at baseline predict onset of psychotic experiences at 12 months – weighting method B

| Model (outcome)            | Parameters                | Odds  | 95% CI     | p-value | AIC  |
|----------------------------|---------------------------|-------|------------|---------|------|
| Model 2a (PQBC cut off T1) | SDSC cut off T0           | 1.568 | 1.36, 1.81 | <0.001  | 5226 |
| Model 2b (PQBC cut off T1) | SDSC cut off T0           | 1.391 | 1.18, 1.64 | <0.001  | 5220 |
|                            | SDSC cut off T1           | 1.268 | 1.07, 1.50 | 0.006   |      |
| Model 2c (PQBC cut off T1) | SDSC cut off T0           | 1.384 | 1.18, 1.62 | <0.001  | 4836 |
|                            | Gender                    | 0.862 | 0.75, 0.99 | 0.035   |      |
|                            | Ethnicity                 | 1.072 | 1.00, 1.15 | 0.039   |      |
|                            | Socioeconomic status      | 1.214 | 1.13, 1.30 | <0.001  |      |
|                            | Neighbourhood deprivation | 1.007 | 1.00, 1.01 | <0.001  |      |
|                            | IQ                        | 0.975 | 0.95, 1.00 | 0.049   |      |
|                            | Family conflict           | 0.998 | 0.96, 1.04 | 0.906   |      |
|                            | Stimulant medication      | 1.583 | 1.19, 2.10 | 0.001   |      |
|                            |                           |       |            |         |      |
| Model 2d (PQBC cut off T1) | SDSC cut off T0           | 1.248 | 1.04, 1.49 | 0.015   | 4832 |
|                            | SDSC cut off T1           | 1.242 | 1.04, 1.48 | 0.017   |      |
|                            | Gender                    | 0.857 | 0.75, 0.98 | 0.029   |      |
|                            | Ethnicity                 | 1.071 | 1.00, 1.14 | 0.042   |      |
|                            | Socioeconomic status      | 1.205 | 1.12, 1.30 | <0.001  |      |
|                            | Neighbourhood deprivation | 1.007 | 1.00, 1.01 | <0.001  |      |
|                            | IQ                        | 0.975 | 0.95, 1.00 | 0.045   |      |
|                            | Family conflict           | 0.995 | 0.96, 1.03 | 0.798   |      |
|                            | Stimulant medication      | 1.546 | 1.16, 2.05 | 0.003   |      |

SDSC = Sleep Disorder Scale for Children; PQBC = Prodromal Questionnaire – Brief Child version; CI = confidence intervals; AIC = Akaike information criterion

Supplementary Table 4a: Regression analyses of whether sleep disorders at baseline predict persistence of psychotic experiences at 12 months – weighting method A

| Model (outcome)         | Parameters                | Odds  | 95% CI     | p-value | AIC  |
|-------------------------|---------------------------|-------|------------|---------|------|
| Model 3a (PQBC persist) | SDSC cut off T0           | 1.841 | 1.57, 2.16 | <0.001  | 5996 |
| Model 3b (PQBC persist) | SDSC persist              | 2.058 | 1.71, 2.48 | <0.001  | 5994 |
| Model 3c (PQBC persist) | SDSC cut off T0           | 1.598 | 1.60, 1.60 | <0.001  | 5537 |
|                         | Gender                    | 0.808 | 0.81, 0.81 | <0.001  |      |
|                         | Ethnicity                 | 1.022 | 1.02, 1.02 | <0.001  |      |
|                         | Socioeconomic status      | 1.220 | 1.22, 1.22 | <0.001  |      |
|                         | Neighbourhood deprivation | 1.009 | 1.01, 1.01 | <0.001  |      |
|                         | IQ                        | 0.960 | 0.96, 0.96 | <0.001  |      |
|                         | Family conflict           | 1.002 | 1.00, 1.00 | <0.001  |      |
|                         | Stimulant medication      | 1.508 | 1.51, 1.51 | <0.001  |      |
| Model 3d (PQBC persist) | SDSC persist              | 1.795 | 1.46, 2.20 | <0.001  | 5532 |
|                         | Gender                    | 0.813 | 0.69, 0.95 | 0.010   |      |
|                         | Ethnicity                 | 1.025 | 0.95, 1.10 | 0.517   |      |
|                         | Socioeconomic status      | 1.217 | 1.12, 1.32 | <0.001  |      |
|                         | Neighbourhood deprivation | 1.010 | 1.01, 1.01 | <0.001  |      |
|                         | IQ                        | 0.963 | 0.94, 0.99 | 0.008   |      |
|                         | Family conflict           | 1.004 | 0.96, 1.05 | 0.844   |      |
|                         | Stimulant medication      | 1.567 | 1.15, 2.14 | 0.005   |      |

persist = above cut off at T0 and T1; SDSC = Sleep Disorder Scale for Children; PQBC = Prodromal Questionnaire – Brief Child version; CI = confidence intervals; AIC = Akaike information criterion.

Supplementary Table 4b: Regression analyses of whether sleep disorders at baseline predict persistence of psychotic experiences at 12 months – weighting method B

| Model (outcome)         | Parameters                | Odds  | 95% CI     | p-value | AIC  |
|-------------------------|---------------------------|-------|------------|---------|------|
| Model 3a (PQBC persist) | SDSC cut off T0           | 1.671 | 1.44, 1.94 | <0.001  | 4989 |
| Model 3b (PQBC persist) | SDSC persist              | 1.828 | 1.54, 2.17 | <0.001  | 4987 |
| Model 3c (PQBC persist) | SDSC cut off T0           | 1.473 | 1.25, 1.73 | <0.001  | 4609 |
|                         | Gender                    | 0.862 | 0.75, 1.00 | 0.043   |      |
|                         | Ethnicity                 | 1.042 | 0.97, 1.12 | 0.237   |      |
|                         | Socioeconomic status      | 1.208 | 1.13, 1.30 | <0.001  |      |
|                         | Neighbourhood deprivation | 1.007 | 1.00, 1.01 | <0.001  |      |
|                         | IQ                        | 0.969 | 0.94, 0.99 | 0.017   |      |
|                         | Family conflict           | 1.006 | 0.97, 1.05 | 0.744   |      |
|                         | Stimulant medication      | 1.407 | 1.06, 1.86 | 0.017   |      |
| Model 3d (PQBC persist) | SDSC persist              | 1.598 | 1.33, 1.92 | <0.001  | 4321 |
|                         | Gender                    | 0.862 | 0.75, 0.99 | 0.042   |      |
|                         | Ethnicity                 | 1.043 | 0.97, 1.12 | 0.232   |      |
|                         | Socioeconomic status      | 1.203 | 1.12, 1.29 | <0.001  |      |
|                         | Neighbourhood deprivation | 1.007 | 1.00, 1.01 | <0.001  |      |
|                         | IQ                        | 0.969 | 0.94, 0.99 | 0.016   |      |
|                         | Family conflict           | 1.007 | 0.97, 1.05 | 0.717   |      |
|                         | Stimulant medication      | 1.406 | 1.06, 1.86 | 0.018   |      |

persist = above cut off at T0 and T1; SDSC = Sleep Disorder Scale for Children; PQBC = Prodromal Questionnaire – Brief Child version; CI = confidence intervals; AIC = Akaike information criterion.



**RQ4a: Regression analysis of whether remission of sleep problems predicts remission of psychotic experiences (weighted method A):**

Remission of sleep disorder symptoms was not a significant predictor of remission of psychotic experiences (OR=1.041,  $p=0.588$ , 95% CI 0.80, 1.35,  $p=0.766$ , AIC=5241) in the uncontrolled model, therefore the analysis with control variables was not carried out.

**RQ4a: Regression analysis of whether remission of sleep problems predicts remission of psychotic experiences (weighted method B):**

Remission of sleep disorder symptoms was not a significant predictor of remission of psychotic experiences (OR=1.011,  $p=0.588$ , 95% CI 0.79, 1.29,  $p=0.929$ ) in the uncontrolled model, therefore the analysis with control variables was not carried out.
