# Supplementary material for: Sleep disorders predict the one-year onset, persistence, but not remission of psychotic experiences in pre-adolescence: a longitudinal analysis of the ABCD cohort data
Source: bioRxiv or medRxiv preprint supplement (doi:10.1101/2021.01.15.21249864), 2021-09-07
Supplement: Supplementary file [file media-2.pdf]

Supplementary document 1: R packages used in analysis

| Package    | Version   | Citation                                     |
|------------|-----------|----------------------------------------------|
| dplyr      | 1.0.2     | (Wickham, François, Henry, & Müller, 2020)   |
| readr      | 1.3.1     | (Wickham, Hester, & Francois, 2018)          |
| tidyr      | 1.1.1     | (Wickham, 2020)                              |
| psych      | 1.9.12.31 | (Revelle, 2020)                              |
| knitr      | 1.29      | (Xie, 2020)                                  |
| survey     | 3.37      | (Lumley, 2020)                               |
| lme4       | 1.1.21    | (Bates, Maechler, Bolke, & Walker, 2019)     |
| lmerTest   | 3.1.1     | (Kuznetsova, Brockhoff, & Christensen, 2019) |
| memisc     | 0.99.22   | (Elff, 2020)                                 |
| mfx        | 1.2.2     | (Fernihough, 2019)                           |
| MASS       | 7.3.51.5  | (Ripley, 2019)                               |
| parameters | 0.8.2     | (Lüdecke, Waggoner, & Makowski, 2019)        |

Bates, D., Maechler, M., Bolke, B., & Walker, S. (2019). *Linear Mixed-Effects Models using “Eigen” and S4* [R package *lme4* version 1.1.21]. Comprehensive R Archive Network (CRAN).

Elff, M. (2020). *Management of Survey Data and Presentation of Analysis Results* [R package *memisc* version 0.99.22]. Comprehensive R Archive Network (CRAN).

Fernihough, A. (2019). *Marginal Effects, Odds Ratios and Incidence Rate Ratios for GLMs* [R package *mfx* version 1.2-2]. Comprehensive R Archive Network (CRAN).

Kuznetsova, A., Brockhoff, P., & Christensen, R. (2019). *Tests in Linear Mixed Effects Models* [R package *lmerTest* version 3.1.1]. Comprehensive R Archive Network (CRAN).

Lüdecke, D., Waggoner, P., & Makowski, D. (2019). A Unified Interface to Access Information from Model Objects in R [R package *parameters* version 0.8.2]. *Journal of Open Source*

*Software*, 4(38), 1412. <https://doi.org/10.21105/joss.01412>

Lumley, T. (2020). *survey: analysis of complex survey samples* [R package *survey* version 3.37].

Comprehensive R Archive Network (CRAN).

Revelle, W. (2020). *Procedures for Psychological, Psychometric, and Personality Research* [R package *psych* version 1.9.12.31]. Comprehensive R Archive Network (CRAN).

Ripley, B. (2019). *Support Functions and Datasets for Venables and Ripley's MASS* [R package *MASS* version 7.3.51.5]. Comprehensive R Archive Network (CRAN).

Wickham, H. (2020). *Tidy Messy Data* [R package *tidyr* version 1.1.1]. Comprehensive R Archive Network (CRAN).

Wickham, H., François, R., Henry, L., & Müller, K. (2020). *A Grammar of Data Manipulation* [R package *dplyr* version 1.0.2]. Comprehensive R Archive Network (CRAN).

Wickham, H., Hester, J., & François, R. (2018). *Read Rectangular Text Data* [R package *readr* version 1.3.1]. Comprehensive R Archive Network (CRAN).

Xie, Y. (2020). *A General-Purpose Package for Dynamic Report Generation in R* [R package *knitr* version 1.29]. Comprehensive R Archive Network (CRAN).
